# Supplementary material for: A randomized controlled trial for response of microbiome network to exercise and diet intervention in patients with nonalcoholic fatty liver disease
Source: PubMed Central journal article supplement (PMC9091228; doi:10.1038/s41467-022-29968-0), 2022-05-10
Supplement: 41467_2022_29968_MOESM1_ESM.pdf [file 41467_2022_29968_MOESM1_ESM.pdf]

## Supplementary Information

### Supplementary figures

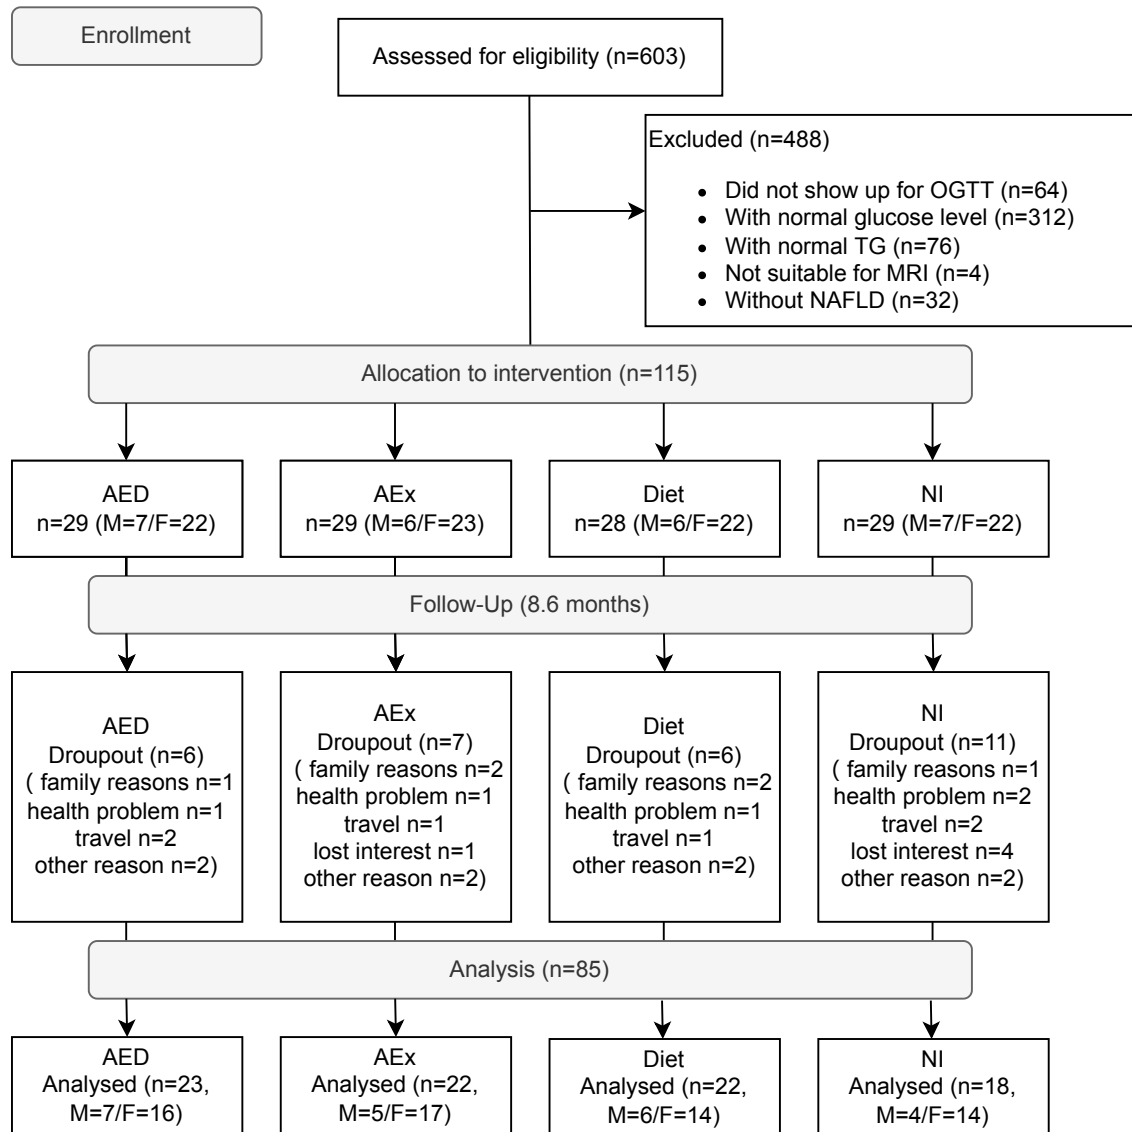

**Fig. S1 CONSORT diagram.** OGTT = oral glucose tolerance test; TG = triglyceride; MRS = proton magnetic resonance spectroscopy; M = male; F = female.

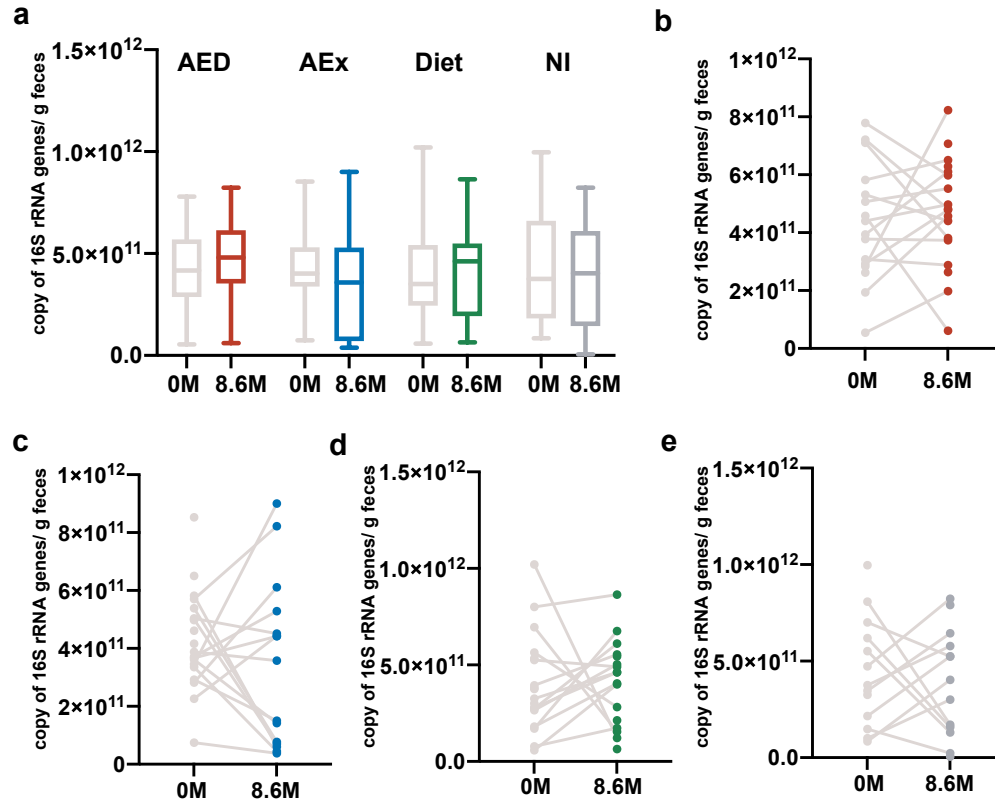

**Fig. S2 Changes in the absolute abundance of gut microbiota before and after intervention.** (a) Box plot of microbiome absolute abundance in four groups at two time points. No significant differences were observed between the groups before and after intervention. The p-values at baseline and 8.6 months were 0.96 and 0.50, respectively. Data were expressed as mean  $\pm$  SD. Comparisons of change between groups were performed using one-way analysis of variance (ANOVA). (b-e) There are no significant absolute abundance changes within the groups after intervention (two-tailed paired test. b: AED: n = 20, p = 0.79; c: AEx: n = 20, p = 0.63; d: Diet: n = 21, p = 0.72; e: NI: n = 15, p = 0.91).

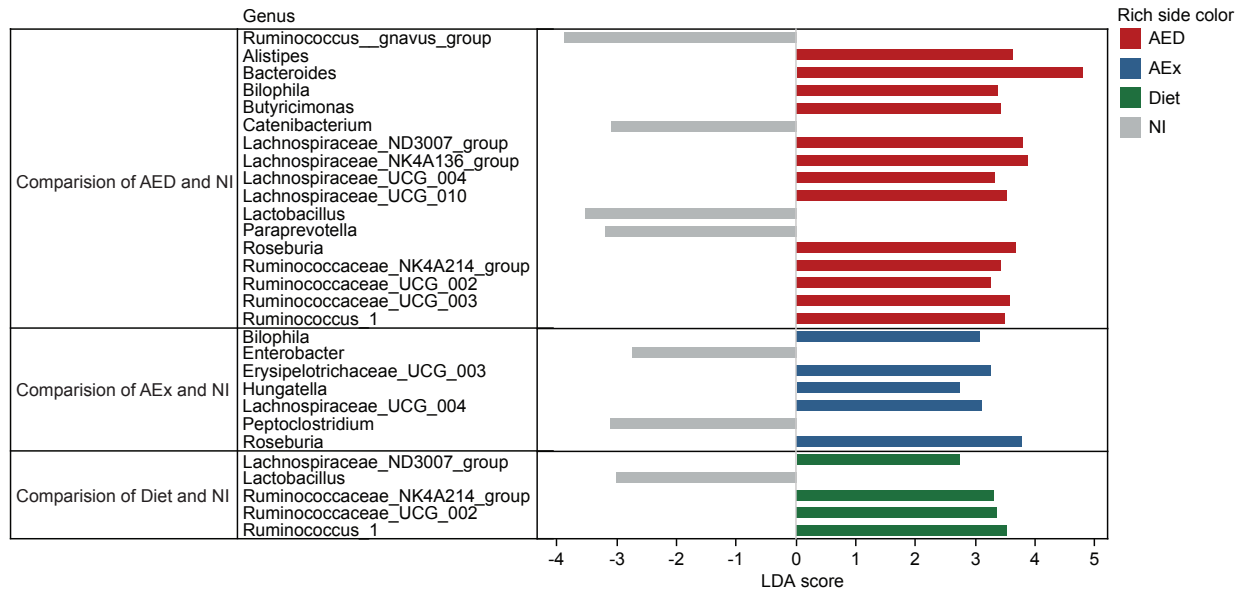

**Fig. S3 Differential genus between the AED/AEx/Diet groups and NI group.** LEfSe analysis in genus level (adjusted  $p < 0.05$ ,  $\log_2$  fold change  $> 2$ ).

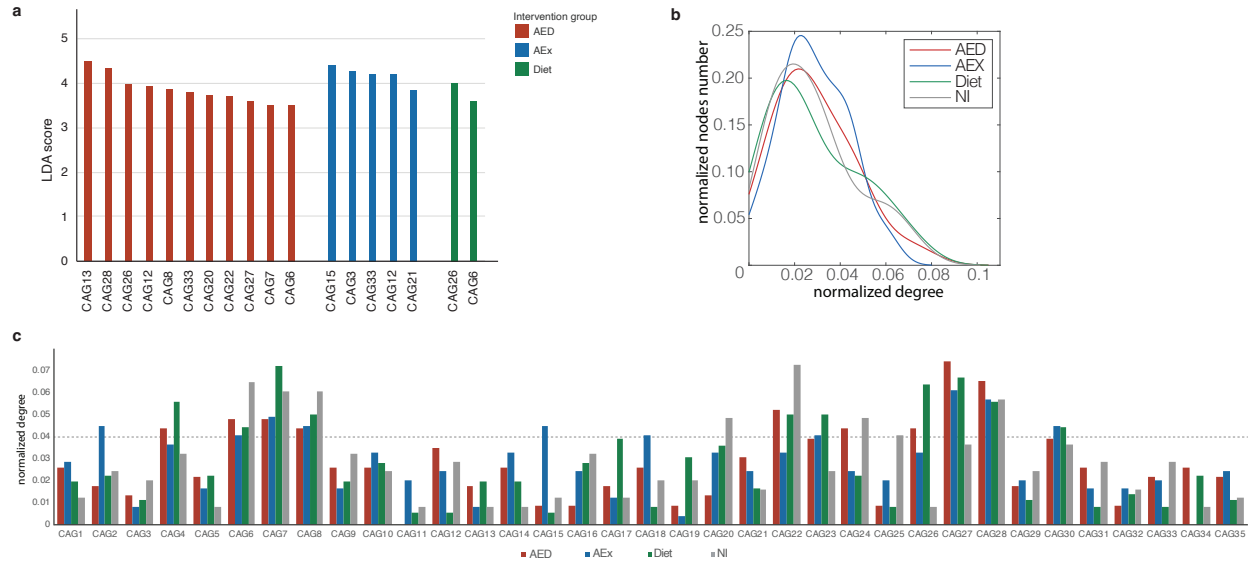

**Fig. S4 CAG abundance and co-occurrence network features.** (a) Differences in CAGs between AED/AEx/Diet groups and the NI group after intervention. CAGs: co-abundance groups. LefSe analysis was performed under the condition of adjusted  $p < 0.05$  and  $\log_2$  fold change  $> 2$ . (b) The distribution of the CAG nodes corresponding to different degrees. (c) Normalized degree of each CAG node. AED:  $n = 20$ , AEx:  $n = 20$ , Diet:  $n = 21$ , NI:  $n = 15$ .

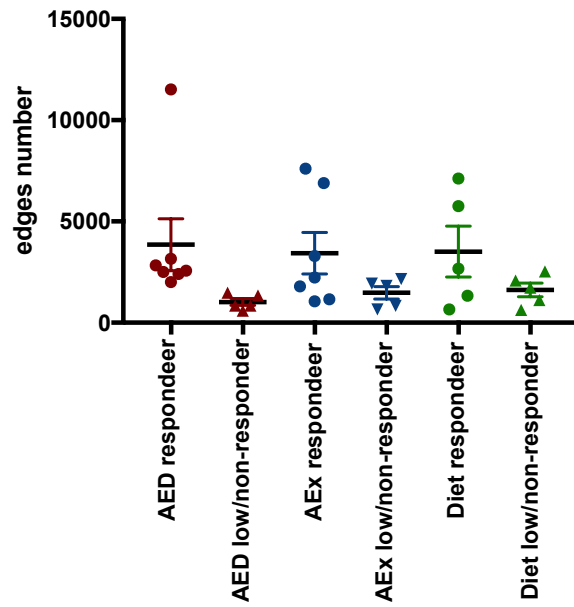

**Fig. S5 Relative changes of the Singel SparCC network edge number.** Data were expressed as mean  $\pm$  SEM. Significance was calculated by two-tailed unpaired t test. No statistical significance was observed within groups (AED: n = 12, FC of responder and low/non-responder = 3.0, p = 0.078; AEx: n = 12, FC = 2.3, p = 0.15; Diet: n = 10, FC = 2.2, p = 0.18). Dots with different colors represent subjects.

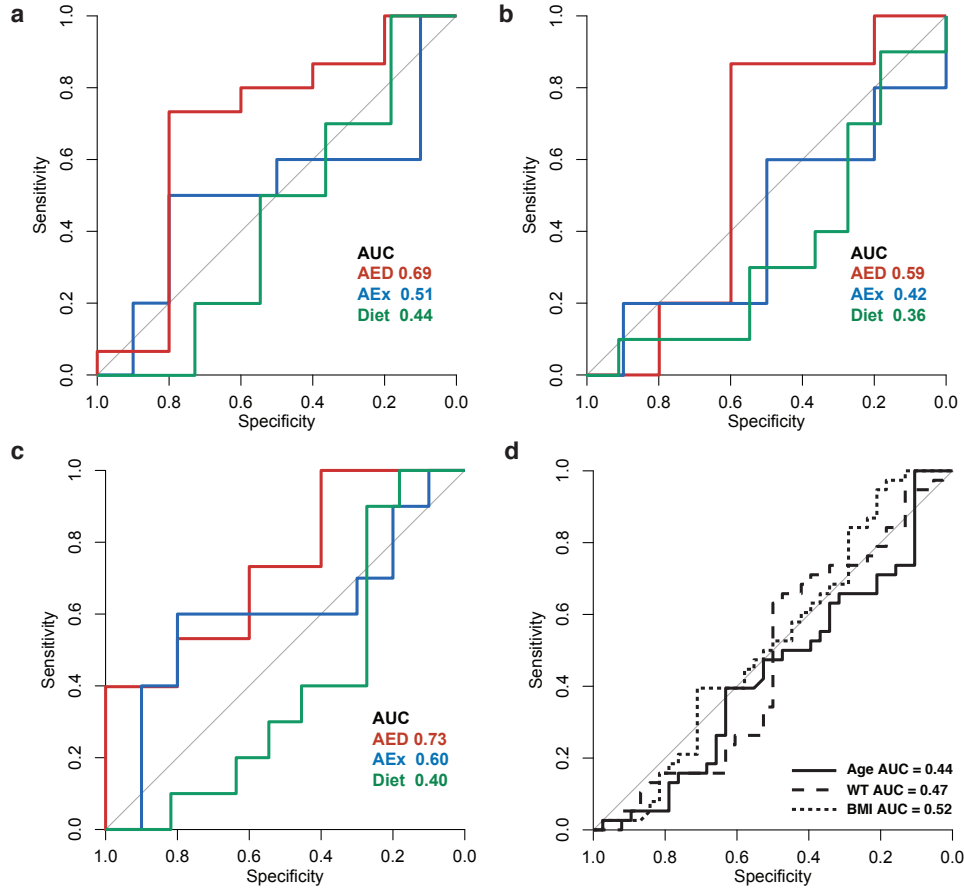

**Fig. S6 The ROC curve of physical parameters predicting the effect of intervention response. (a-c)** AED: Arobic exercise + diet; AEx: Arobic exercise and Diet groups. Age as pridictor (**a**), Body weight as productor (WT, **b**) and body mass index as predictor (BMI, **c**) respectively. (**d**) all intervention groups together. AED: n = 12, AEx: n = 12, Diet: n = 10.

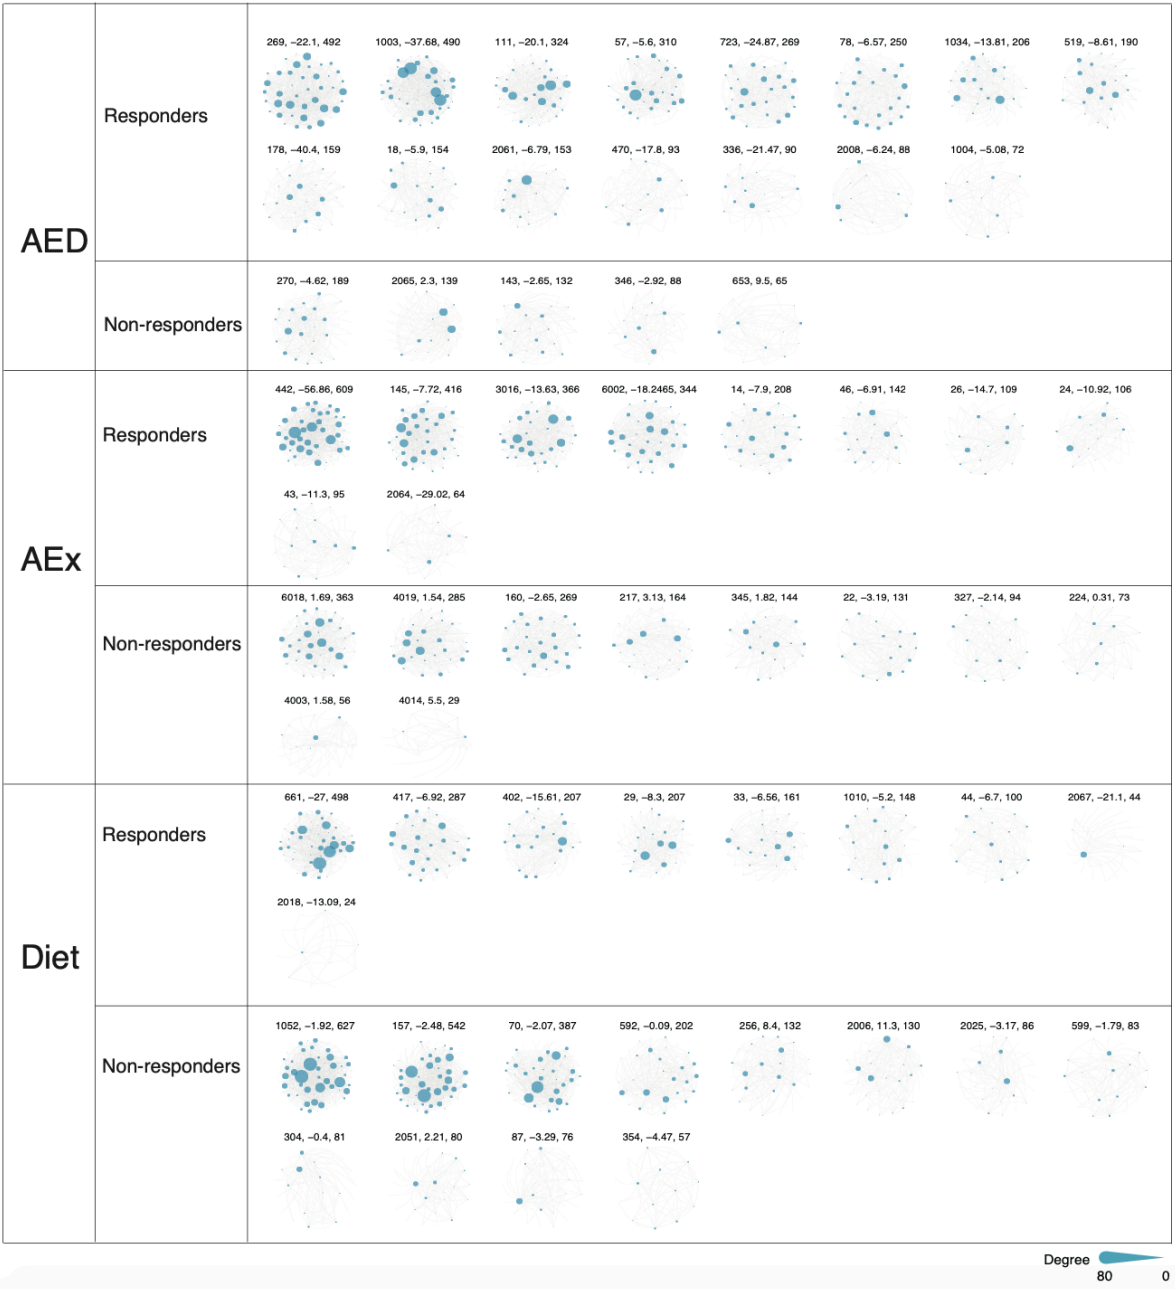

**Fig. S7 The Single SparCC network for each individual before intervention in AED/AEx/Diet groups based on 16s rRNA sequence data. Three numbers under every individual network represent subject ID, HFC percentage change and edge numbers respectively.**

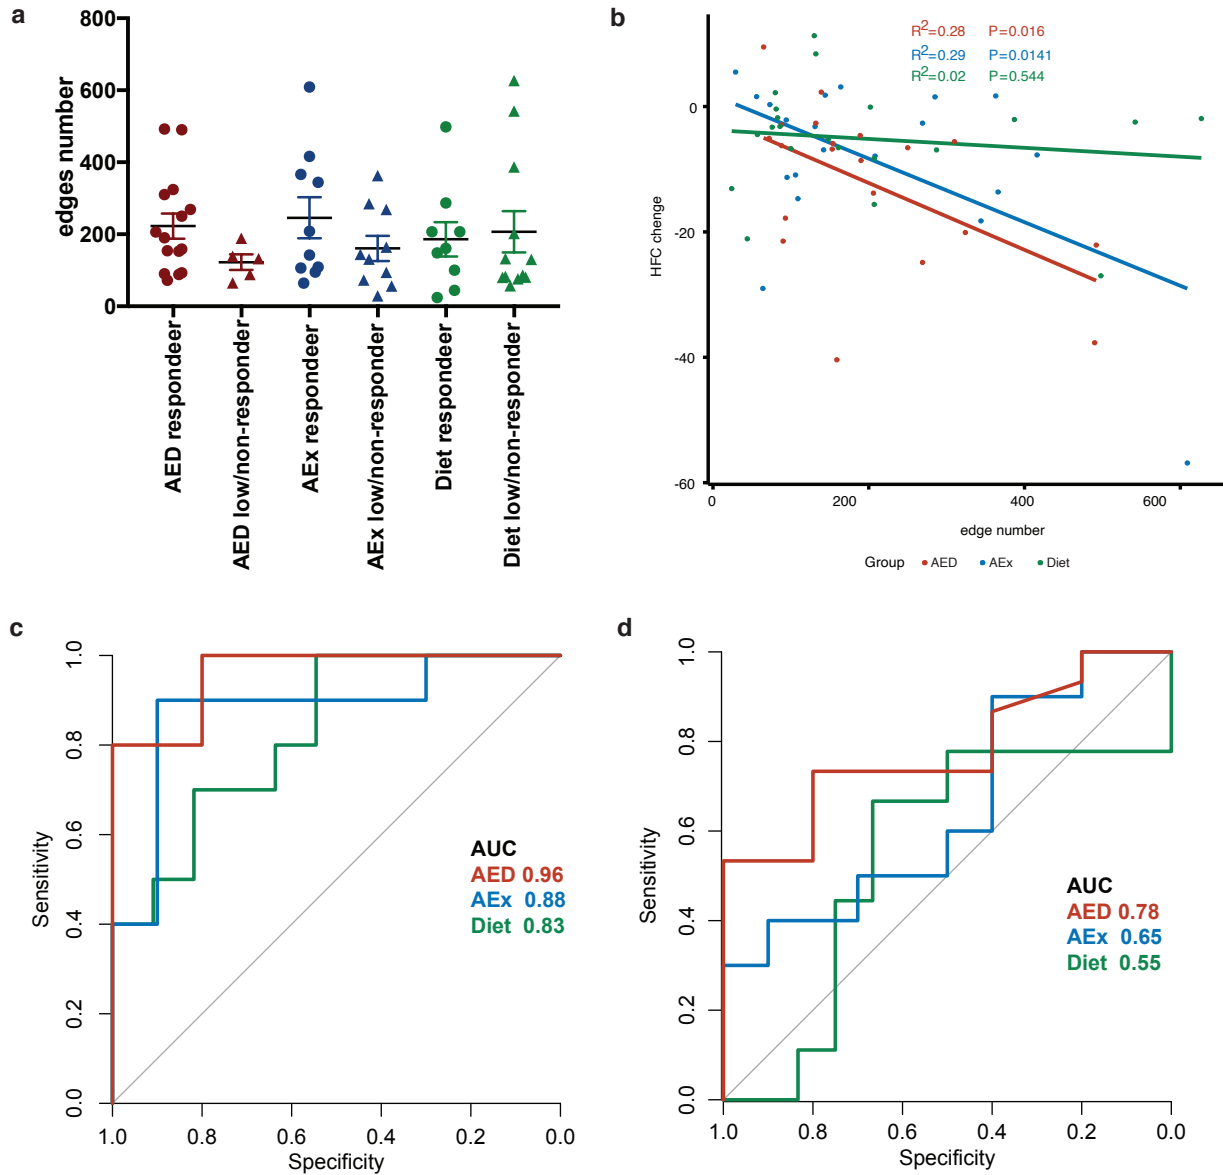

**Fig. S8 Intervention efficiency predicted by individual baseline gut microbial networks on 16s rRNA sequence data.** (a) Relative changes of the Single SparCC network edge number. Data were expressed as mean  $\pm$  SEM. Significance was calculated by two-tailed unpaired t test. No statistical significance was observed within groups (AED: FC of responder and low/non-responder = 1.8,  $p = 0.13$ ; AEx: FC = 1.5,  $p = 0.22$ ; Diet: FC = 0.90,  $p = 0.79$ ). Dots with different colors represent subjects. (b) Linear regressions of edge number (Single SparCC network) with the change of HFC after intervention. (c) ROC curve by supervised Lasso model performance. (d) ROC curve of edge number for differential responders from low/non-responders within each intervention group by unsupervised classification. AED:  $n = 20$ , AEx:  $n = 20$ , Diet:  $n = 21$ , NI:  $n = 15$ .



## Supplementary table

**Table S1.** Comparison of baseline to the follow-up values of body composition and clinical biomarkers controlled for the baseline value and intervention duration.

| Variables                | NI (n=18)        |                    | AEx (n=22)            | Diet (n=22)          | AED (n=23)           | Group by time |                        |
|--------------------------|------------------|--------------------|-----------------------|----------------------|----------------------|---------------|------------------------|
|                          | 0-m <sup>§</sup> | 8.6-m              | 8.6-m                 | 8.6-m                | 8.6-m                | p             | Partial η <sup>2</sup> |
| Age (years) <sup>§</sup> |                  | 60.6 (59.0 – 62.2) | 59.3 (57.3 – 61.3)    | 59.7 (57.7 – 61.7)   | 59.4 (57.8 – 61.1)   | 0.765         |                        |
| Height (cm) <sup>§</sup> |                  | 156 (151 – 161)    | 161 (157 – 166)       | 160 (158 – 163)      | 164 (161 – 168)**    | 0.033         |                        |
| HFC (%)                  | 18.3             | 16.1 (12.4 – 19.9) | 10.3 (7.1 – 13.5)*    | 12.9 (9.8 – 16.1)†   | 7.34 (4.1 – 10.6)**  | 0.005         | 0.167                  |
| Weight (kg)              | 68.9             | 68.6 (67.4 – 69.7) | 67.2 (66.3 – 68.2)    | 67.7 (66.8 – 68.6)   | 67.2 (66.2 – 68.1)   | 0.240         | 0.058                  |
| Fat (%)                  | 37.1             | 37.9 (37.1 – 38.6) | 35.8 (35.2 – 36.5)*** | 36.6 (36.0 – 37.2)*  | 36.5 (35.8 – 37.1)** | 0.002         | 0.193                  |
| BMI                      | 26.6             | 26.4 (26.0 – 26.9) | 25.9 (25.5 – 26.3)    | 26.1 (25.8 – 26.5)   | 26.0 (25.6 – 26.4)   | 0.321         | 0.050                  |
| Glucose (mmol/L)         | 5.58             | 5.89 (5.57 – 6.22) | 5.43 (5.15 – 5.71)    | 5.81 (5.53 – 6.08)   | 5.78 (5.50 – 6.06)   | 0.128         | 0.077                  |
| Insulin (μIU/mL)         | 16.4             | 13.4 (10.4 – 16.3) | 15.7 (13.2 – 18.3)    | 14.7 (12.2 – 17.2)   | 16.0 (13.4 – 18.6)   | 0.554         | 0.029                  |
| HBA1c (%)                | 6.14             | 6.11 (5.94 – 6.29) | 6.12 (5.97 – 6.27)    | 6.09 (5.95 – 6.24)   | 6.03 (5.88 – 6.18)   | 0.857         | 0.011                  |
| HOMA-IR                  | 4.11             | 3.55 (2.72 – 4.38) | 3.89 (3.16 – 4.61)    | 3.80 (3.09 – 4.51)   | 4.10 (3.38 – 4.82)   | 0.799         | 0.014                  |
| Triglyceride (mmol/L)    | 2.19             | 2.09 (1.45 – 2.73) | 2.24 (1.69 – 2.79)    | 1.78 (1.25 – 2.32)   | 2.49 (1.94 – 3.04)   | 0.329         | 0.048                  |
| FFA (mmol/L)             | 0.575            | 0.47 (0.37 – 0.56) | 0.36 (0.28 – 0.44)    | 0.46 (0.39 – 0.53)   | 0.47 (0.39 – 0.55)   | 0.158         | 0.075                  |
| ALT (U/L)                | 23.9             | 29.9 (24.3 – 35.5) | 20.5 (15.6 – 25.3)*   | 17.2 (12.5 – 21.9)** | 21.2 (16.3 – 26.0)*  | 0.010         | 0.149                  |
| AST (U/L)                | 24.6             | 26.6 (22.0 – 31.2) | 24.6 (20.8 – 28.6)    | 22.6 (18.8 – 26.4)   | 22.1 (18.2 – 26.0)   | 0.428         | 0.040                  |
| GGT (U/L)                | 26.9             | 26.3 (19.6 – 32.9) | 30.3 (24.8 – 35.8)    | 27.2 (21.6 – 32.8)   | 30.9 (25.4 – 36.4)   | 0.625         | 0.025                  |

Subjects were those who have both baseline and follow-up gut microbiota data (Marginal mean (95% confidence interval)). General linear model of analysis of variance controlled for covariates (ANCOVA) for repeated measures (2 factor interactions: group x time) and controlled for baseline value of each variable and intervention duration followed by Sidak correction for multiple comparison between the groups. Contrast results (K Matrix) were used to localize the group differences: \* p < 0.05, \*\* p < 0.01 and \*\*\* p < 0.001 by contrast to the NI group. † p < 0.05 by contrast to the AED group. Partial η<sup>2</sup> = effect size. § Baseline marginal means are the same for all groups since values were controlled for baseline value of each variable and intervention duration. NI = No intervention group; AEx = Exercise group; AED = AEx+Diet group; HFC = Hepatic fat content; HBA1c = glycated haemoglobin; HOMA-IR = homeostasis model assessment of insulin resistance index, FFA = Free fatty acids, ALT = Alanine

aminotransferase; AST = aspartate aminotransferase; GGT =  $\gamma$ -glutamyltransferase. All the biochemical markers are fasting samples.

**Table S2.** The core ASV of CAG at different taxonomic levels.

| CAG   | Core ASV | phylum         | class               | order              | family              | genus                                |
|-------|----------|----------------|---------------------|--------------------|---------------------|--------------------------------------|
| CAG1  | ASV2     | Proteobacteria | Gammaproteobacteria | Enterobacteriales  | Enterobacteriaceae  | <i>Escherichia-Shigella</i>          |
| CAG2  | ASV37    | Firmicutes     | Clostridia          | Clostridiales      | Lachnospiraceae     | <i>Anaerostipes</i>                  |
| CAG3  | ASV4     | Firmicutes     | Clostridia          | Clostridiales      | Ruminococcaceae     | <i>Faecalibacterium</i>              |
| CAG4  | ASV5     | Firmicutes     | Clostridia          | Clostridiales      | Lachnospiraceae     | <i>Blautia</i>                       |
| CAG5  | ASV24    | Firmicutes     | Bacilli             | Lactobacillales    | Streptococcaceae    | <i>Streptococcus</i>                 |
| CAG6  | ASV101   | Bacteroidetes  | Bacteroidia         | Bacteroidales      | Bacteroidaceae      | <i>Bacteroides</i>                   |
| CAG7  | ASV233   | Firmicutes     | Clostridia          | Clostridiales      | Ruminococcaceae     | <i>Ruminococcaceae UCG-4</i>         |
| CAG8  | ASV70    | Bacteroidetes  | Bacteroidia         | Bacteroidales      | Rikenellaceae       | <i>Alistipes</i>                     |
| CAG9  | ASV21    | Bacteroidetes  | Bacteroidia         | Bacteroidales      | Bacteroidaceae      | <i>Bacteroides</i>                   |
| CAG10 | ASV99    | Firmicutes     | Erysipelotrichia    | Erysipelotrichales | Erysipelotrichaceae | <i>Erysipelatoclostridium</i>        |
| CAG11 | ASV38    | Bacteroidetes  | Bacteroidia         | Bacteroidales      | Bacteroidaceae      | <i>Bacteroides</i>                   |
| CAG12 | ASV17    | Bacteroidetes  | Bacteroidia         | Bacteroidales      | Bacteroidaceae      | <i>Bacteroides</i>                   |
| CAG13 | ASV7     | Firmicutes     | Negativicutes       | Selenomonadales    | Acidaminococcaceae  | <i>Phascolarctobacterium</i>         |
| CAG14 | ASV36    | Bacteroidetes  | Bacteroidia         | Bacteroidales      | Prevotellaceae      | <i>Prevotella 9</i>                  |
| CAG15 | ASV92    | Bacteroidetes  | Bacteroidia         | Bacteroidales      | Prevotellaceae      | <i>Prevotella 9</i>                  |
| CAG16 | ASV63    | Bacteroidetes  | Bacteroidia         | Bacteroidales      | Prevotellaceae      | <i>Prevotella 9</i>                  |
| CAG17 | ASV94    | Bacteroidetes  | Bacteroidia         | Bacteroidales      | Tannerellaceae      | <i>Parabacteroides</i>               |
| CAG17 | ASV194   | Bacteroidetes  | Bacteroidia         | Bacteroidales      | Tannerellaceae      | <i>Parabacteroides</i>               |
| CAG18 | ASV3     | Actinobacteria | Actinobacteria      | Bifidobacteriales  | Bifidobacteriaceae  | <i>Bifidobacterium</i>               |
| CAG19 | ASV12    | Bacteroidetes  | Bacteroidia         | Bacteroidales      | Bacteroidaceae      | <i>Bacteroides</i>                   |
| CAG20 | ASV52    | Bacteroidetes  | Bacteroidia         | Bacteroidales      | Bacteroidaceae      | <i>Bacteroides</i>                   |
| CAG21 | ASV49    | Bacteroidetes  | Bacteroidia         | Bacteroidales      | Bacteroidaceae      | <i>Bacteroides</i>                   |
| CAG22 | ASV89    | Firmicutes     | Clostridia          | Clostridiales      | Ruminococcaceae     | <i>Ruminococcaceae NK4A214 group</i> |
| CAG23 | ASV102   | Firmicutes     | Clostridia          | Clostridiales      | Christensenellaceae | <i>Christensenellaceae R-7 group</i> |
| CAG24 | ASV141   | Actinobacteria | Coriobacteriia      | Coriobacteriales   | Coriobacteriaceae   | <i>Collinsella</i>                   |
| CAG25 | ASV46    | Bacteroidetes  | Bacteroidia         | Bacteroidales      | Bacteroidaceae      | <i>Bacteroides</i>                   |
| CAG26 | ASV45    | Bacteroidetes  | Bacteroidia         | Bacteroidales      | Bacteroidaceae      | <i>Bacteroides</i>                   |

|       |        |                |                     |                       |                     |                                  |
|-------|--------|----------------|---------------------|-----------------------|---------------------|----------------------------------|
| CAG27 | ASV106 | Firmicutes     | Clostridia          | Clostridiales         | Lachnospiraceae     | <i>Coprococcus 2</i>             |
| CAG28 | ASV11  | Firmicutes     | Clostridia          | Clostridiales         | Ruminococcaceae     | <i>Subdoligranulum</i>           |
| CAG29 | ASV23  | Firmicutes     | Clostridia          | Clostridiales         | Lachnospiraceae     | <i>Roseburia</i>                 |
| CAG30 | ASV1   | Firmicutes     | Clostridia          | Clostridiales         | Ruminococcaceae     | <i>Faecalibacterium</i>          |
| CAG31 | ASV32  | Firmicutes     | Negativicutes       | Selenomonadales       | Veillonellaceae     | <i>Dialister</i>                 |
| CAG32 | ASV6   | Firmicutes     | Clostridia          | Clostridiales         | Lachnospiraceae     | <i>Agathobacter</i>              |
| CAG33 | ASV62  | Proteobacteria | Gammaproteobacteria | Betaproteobacteriales | Burkholderiaceae    | <i>Parasutterella</i>            |
| CAG34 | ASV30  | Firmicutes     | Clostridia          | Clostridiales         | Ruminococcaceae     | <i>Ruminococcus 2</i>            |
| CAG35 | ASV25  | Firmicutes     | Erysipelotrichia    | Erysipelotrichales    | Erysipelotrichaceae | <i>Erysipelotrichaceae UCG-3</i> |
